# Supplementary material for: Comparison of Chest Radiograph Captions Based on Natural Language Processing vs Completed by Radiologists
Source: PubMed Central journal article supplement (PMC9909497; doi:10.1001/jamanetworkopen.2022.55113), 2023-02-08
Supplement: jamanetwopen-e2255113-s002.pdf [file jamanetwopen-e2255113-s002.pdf]

## Data Sharing Statement

Zhang. Comparison of Chest Radiograph Captions Based on Natural Language Processing vs Completed by Radiologists. *JAMA Netw Open*. Published February 08, 2023.

doi:10.1001/jamanetworkopen.2022.55113

### Data

**Data available:** No

### Additional Information

**Explanation for why data not available:** The dataset is not publicly available to protect patient privacy, since the dataset contains patient-identifiable information. If any researcher wants to use the dataset for scientific purposes, please contact the corresponding author and apply for ethical approval from the data provider.
